# Supplementary material for: A persistent radical anion derived from a propeller-shaped perylene bisimide-carbazole pentad
Source: Royal Society of Chemistry journal article supplement (doi:10.1039/d2cc02042d), 2022-01-01
Supplement: d2cc02042d1.pdf [file d2cc02042d1.pdf]

# Electronic Supplementary Information

## Persistent radical anion derived from a propeller-shaped perylene bisimide-carbazole pentad

Zhaolong Wang,<sup>a</sup> Xinyu Gou,<sup>a</sup> Gang Wang,<sup>a</sup> Xingmao Chang,<sup>a</sup> Ke Liu,<sup>a</sup> Taihong Liu,<sup>\*,a</sup> Gang He,<sup>b</sup> and Yu Fang<sup>\*,a</sup>

<sup>a</sup>Key Laboratory of Applied Surface and Colloid Chemistry of Ministry of Education, School of Chemistry and Chemical Engineering, Shaanxi Normal University, Xi'an 710119, P. R. China

<sup>b</sup>Frontier Institute of Science and Technology, Xi'an Jiaotong University, Xi'an 710054, P. R. China

\*E-mails: [yfang@snnu.edu.cn](mailto:yfang@snnu.edu.cn) (Y. Fang), [liuth121@snnu.edu.cn](mailto:liuth121@snnu.edu.cn) (T. Liu)

## Table of Contents

|                                          |     |
|------------------------------------------|-----|
| 1. General experimental information..... | S3  |
| 2. Supplementary figures and tables..... | S4  |
| <i>References</i> .....                  | S18 |

## 1. General experimental information

**Solvents and reagents:** All the solvents and reagents with at least analytical grade were purchased from commercial sources (Adamas-beta) and used as received without further purification. Cobaltocene ( $\text{CoCp}_2$ ) was handled and stored in a glovebox.

**Instrumental methods:** Single-crystal X-ray diffraction was obtained using a Bruker SMART APEX II single-crystal X-ray diffraction spectrometer. UV-Vis-NIR absorption spectra in solution were recorded on a Perkin-Elmer Lambda 1050 spectrophotometer at room temperature. Electron paramagnetic resonance (EPR) measurements were carried out at room temperature using a Bruker ELEXSYS E500 EPR spectrometer. All samples were reduced using  $\text{CoCp}_2$  as the chemical reductant and loaded into 1.4 mm I.D. quartz tubes, which were sealed with epoxy resin in an argon-filled glovebox and used immediately after preparation. Scans were performed with magnetic field modulation amplitude of 0.1 G. The optical images depicted in the paper were recorded using a Canon 70D camera. The light irradiation tests were carried out by white light of a xenon lamp from Beijing Perfectlight Technology Co., Ltd.

**Quantum chemical calculation:** The geometry of radical anion of PBI-4Cz was optimized by using the broken symmetry and the calculation was carried out using the DFT method with UCAM-B3LYP employing the 6-31G(d) basis set for all atoms. The calculated results were processed by Multiwfn.<sup>1-3</sup>

## 2. Supplementary figures and tables

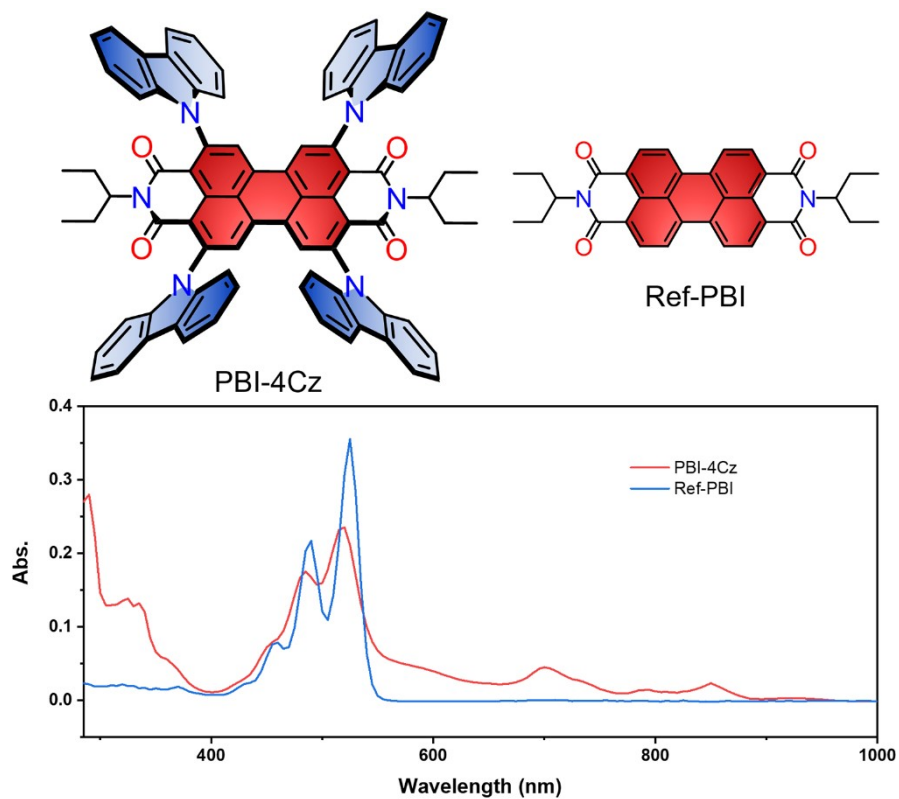

**Figure S1.** Chemical structures of PBI-4Cz and Ref-PBI and their UV-Vis-NIR absorption spectra in DMF.

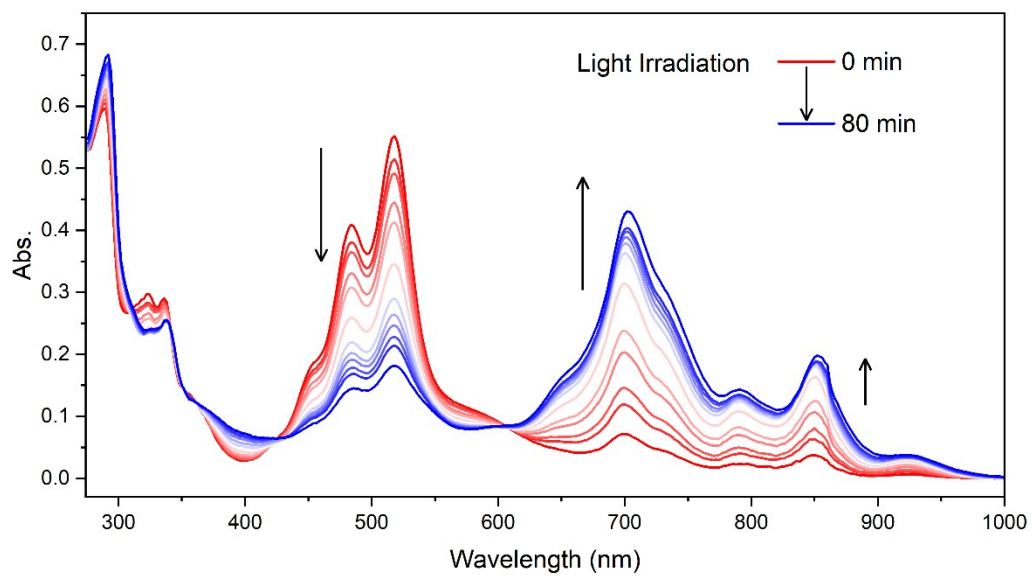

**Figure S2.** Changes in the UV-Vis-NIR absorption spectra of PBI-4Cz in DMF upon light irradiation ( $C \sim 1.0 \times 10^{-5}$  mol/L).

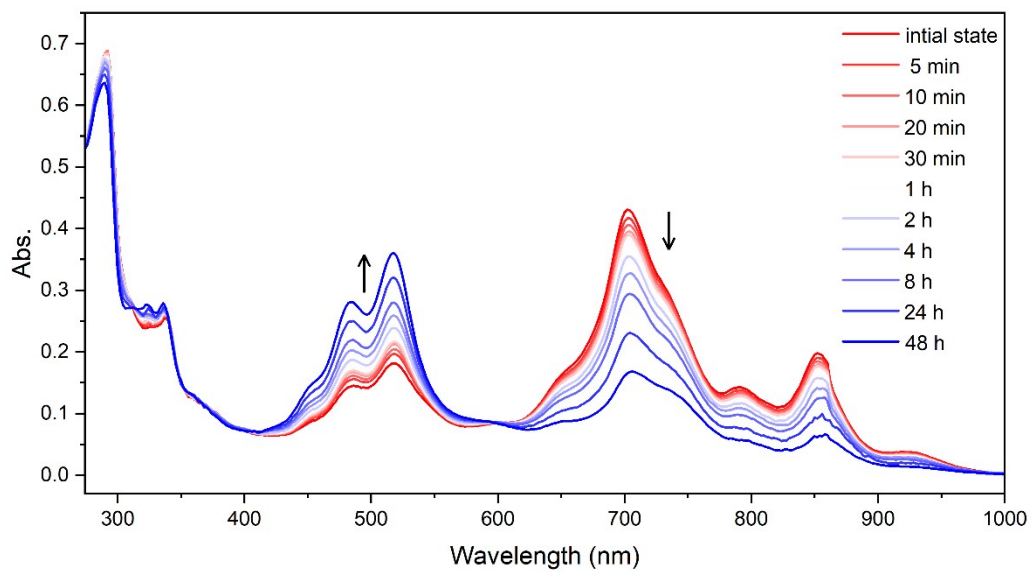

**Figure S3.** Time-dependent UV-Vis-NIR spectra of PBI-4Cz in DMF under dark condition ( $C \sim 1.0 \times 10^{-5}$  mol/L).

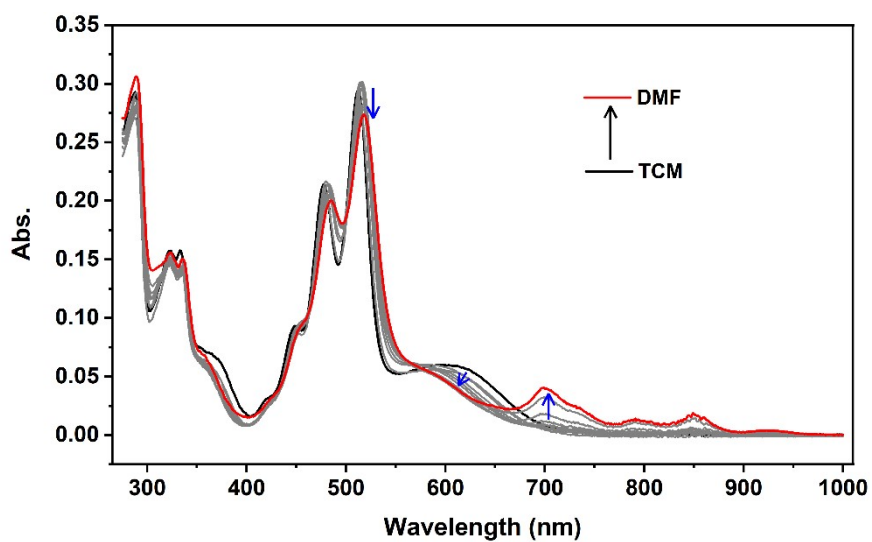

**Figure S4.** UV-Vis-NIR absorption spectra of PBI-4Cz in the binary mixture of DMF and chloroform ( $C \sim 5.0 \times 10^{-6}$  mol/L, 298 K).

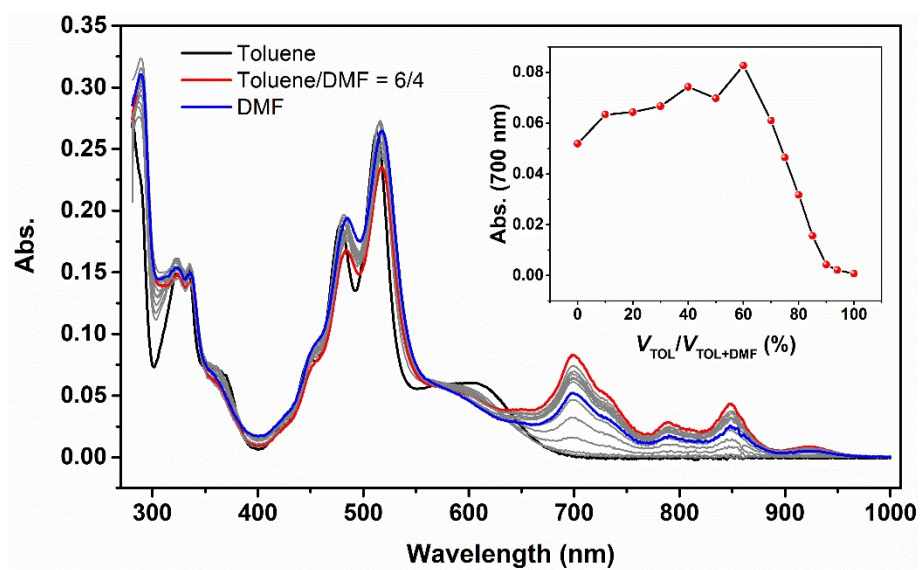

**Figure S5.** UV-Vis-NIR absorption spectra of PBI-4Cz in the binary mixture of DMF and toluene ( $C \sim 5.0 \times 10^{-6}$  mol/L, 298 K). *Inset:* Plot of absorbance at 700 nm versus the content of toluene.



**Table S1.** Summarized electrochemical properties of PBI-4Cz and Ref-PBI.<sup>4</sup>

| <b>Compound</b> | <b><math>E_{1\text{st-red}}/\text{V}</math></b> | <b><math>E_{2\text{nd-red}}/\text{V}</math></b> | <b><math>E_{\text{LUMO}}/\text{eV}</math></b> |
|-----------------|-------------------------------------------------|-------------------------------------------------|-----------------------------------------------|
| PBI-4Cz         | -0.87                                           | -1.20                                           | -3.93                                         |
| Ref-PBI         | -1.10                                           | -1.30                                           | -3.70                                         |

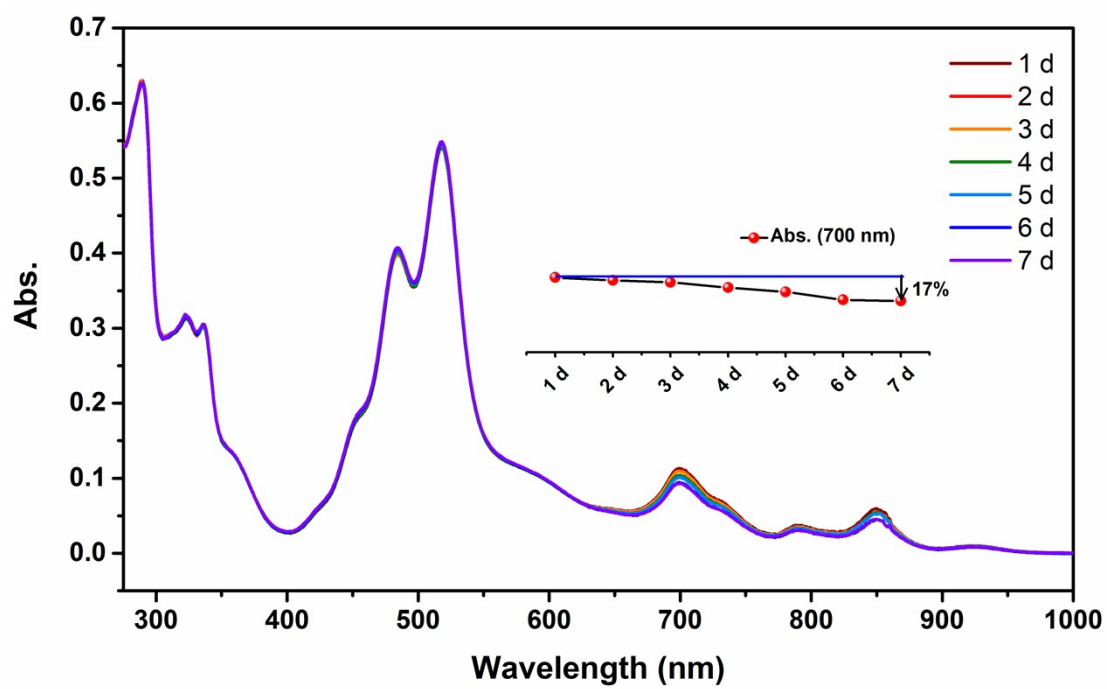

**Figure S6.** Time-dependent UV-Vis-NIR spectra of PBI-4Cz in DMF under ambient air ( $C \sim 1.0 \times 10^{-5}$  mol/L, 298 K).

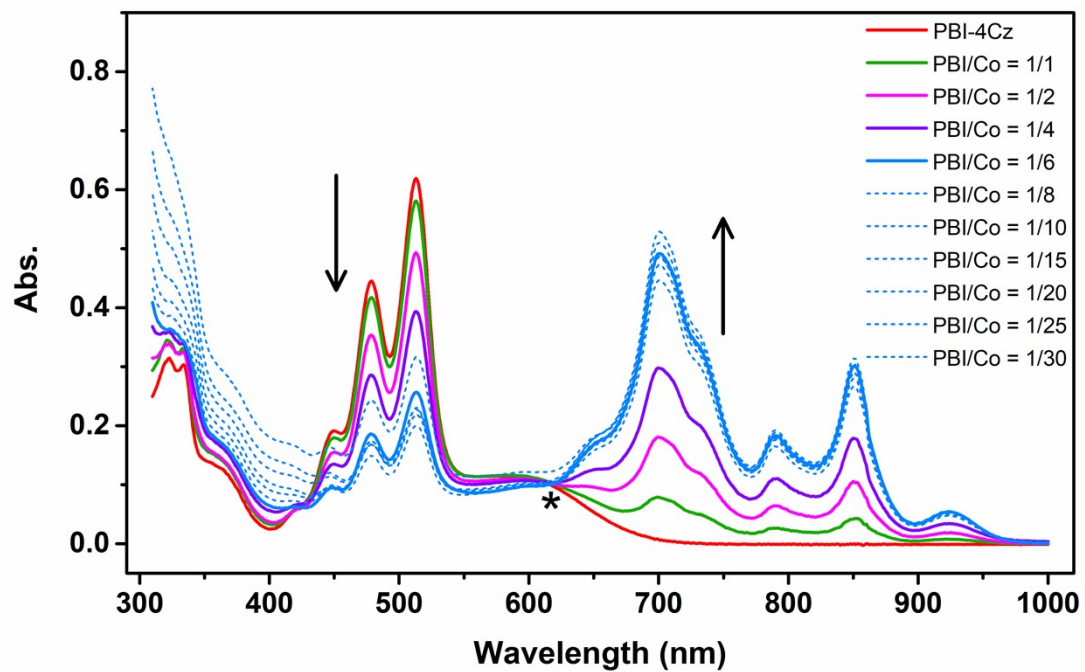

**Figure S7.** UV-Vis-NIR absorption spectra of PBI-4Cz in CH<sub>2</sub>Cl<sub>2</sub> ( $C \sim 1.0 \times 10^{-5}$  mol/L, 298 K) upon gradual addition of CoCp<sub>2</sub>.

**Table S2.** Crystal data and structure refinement for [PBI-4Cz]·(CoCp<sub>2</sub>)<sub>2</sub>

|                                   |                                                                                |          |
|-----------------------------------|--------------------------------------------------------------------------------|----------|
| Identification code               | [PBI-4Cz]·(CoCp <sub>2</sub> ) <sub>2</sub>                                    |          |
| Empirical formula                 | C <sub>105</sub> H <sub>87</sub> Co <sub>2</sub> N <sub>7</sub> O <sub>5</sub> |          |
| Formula weight                    | 1644.67                                                                        |          |
| Temperature                       | 235(2) K                                                                       |          |
| Wavelength                        | 1.34139 Å                                                                      |          |
| Crystal system                    | Orthorhombic                                                                   |          |
| Space group                       | P2 <sub>1</sub> 2 <sub>1</sub> 2 <sub>1</sub>                                  |          |
| Unit cell dimensions              | a = 18.044(10) Å                                                               | α = 90 ° |
|                                   | b = 32.231(19) Å                                                               | β = 90 ° |
|                                   | c = 16.800(9) Å                                                                | γ = 90 ° |
| Volume                            | 9770(10) Å <sup>3</sup>                                                        |          |
| Z                                 | 4                                                                              |          |
| Density (calculated)              | 1.118 mg/m <sup>3</sup>                                                        |          |
| Absorption coefficient            | 2.129 mm <sup>-1</sup>                                                         |          |
| F(000)                            | 3440                                                                           |          |
| Crystal size                      | 0.100 × 0.100 × 0.100 mm <sup>3</sup>                                          |          |
| Theta range for data collection   | 2.385 to 51.587 °                                                              |          |
| Index ranges                      | -20 ≤ h ≤ 19, -32 ≤ k ≤ 37, -19 ≤ l ≤ 19                                       |          |
| Reflections collected             | 71096                                                                          |          |
| Independent reflections           | 15928 [R(int) = 0.2030]                                                        |          |
| Completeness to theta = 51.587 °  | 98.2 %                                                                         |          |
| Absorption correction             | Semi-empirical from equivalents                                                |          |
| Max. and min. transmission        | 0.7501 and 0.5565                                                              |          |
| Refinement method                 | Full-matrix least-squares on F <sup>2</sup>                                    |          |
| Data/restraints/parameters        | 15928/828/1042                                                                 |          |
| Goodness-of-fit on F <sup>2</sup> | 0.901                                                                          |          |
| Final R indices [I > 2σ(I)]       | R <sub>1</sub> = 0.0911, wR <sub>2</sub> = 0.2116                              |          |
| R indices (all data)              | R <sub>1</sub> = 0.2599, wR <sub>2</sub> = 0.2967                              |          |
| Absolute structure parameter      | 0.446(16)                                                                      |          |
| Extinction coefficient            | n/a                                                                            |          |
| Largest diff. peak and hole       | 0.220 and -0.254 e.Å <sup>-3</sup>                                             |          |

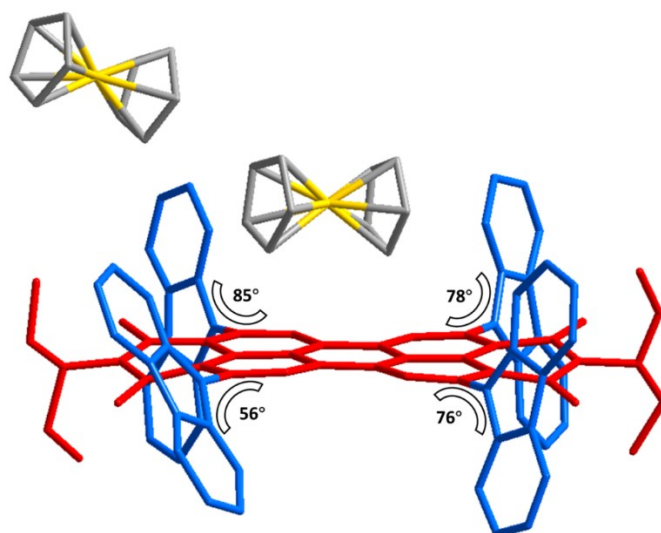

**Figure S8.** Dihedral angles between the plane of PBI and four carbazole moieties.

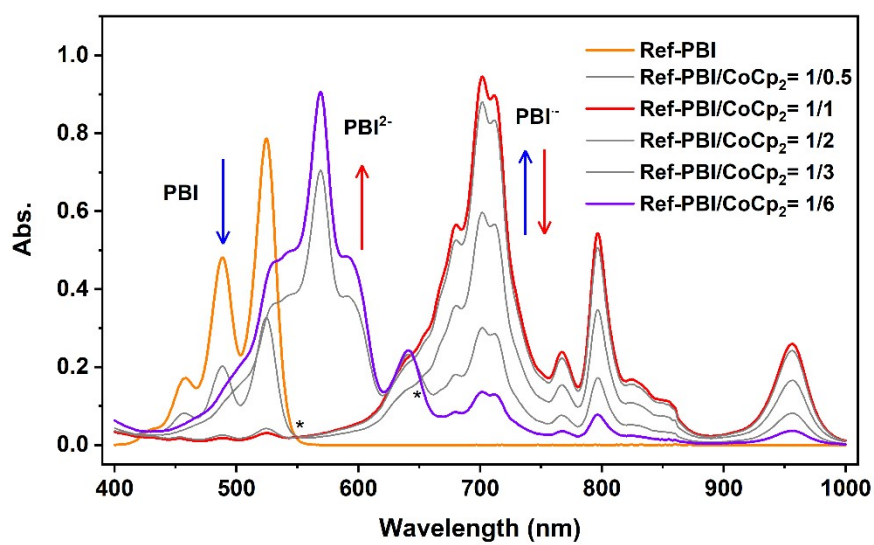

**Figure S9.** UV-Vis-NIR absorption spectra of Ref-PBI in DMF ( $C \sim 1.0 \times 10^{-5}$  mol/L, 298 K) upon gradual addition of CoCp<sub>2</sub>. *Note:* The isobestic points were marked with asterisk.

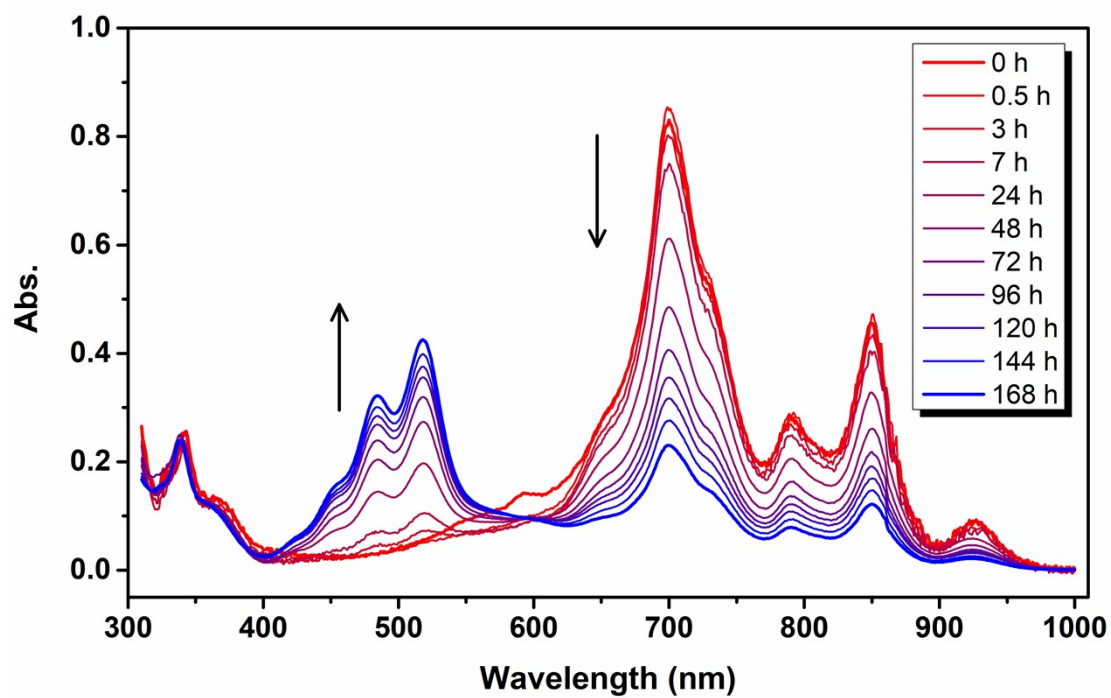

**Figure S10.** Time-dependent UV-Vis-NIR spectra of the fresh PBI<sup>-</sup>-4Cz in DMF under ambient air ( $C \sim 1.0 \times 10^{-5}$  mol/L, 298 K). Note: The fresh PBI<sup>-</sup>-4Cz was obtained via chemically reduced method by CoCp<sub>2</sub>.

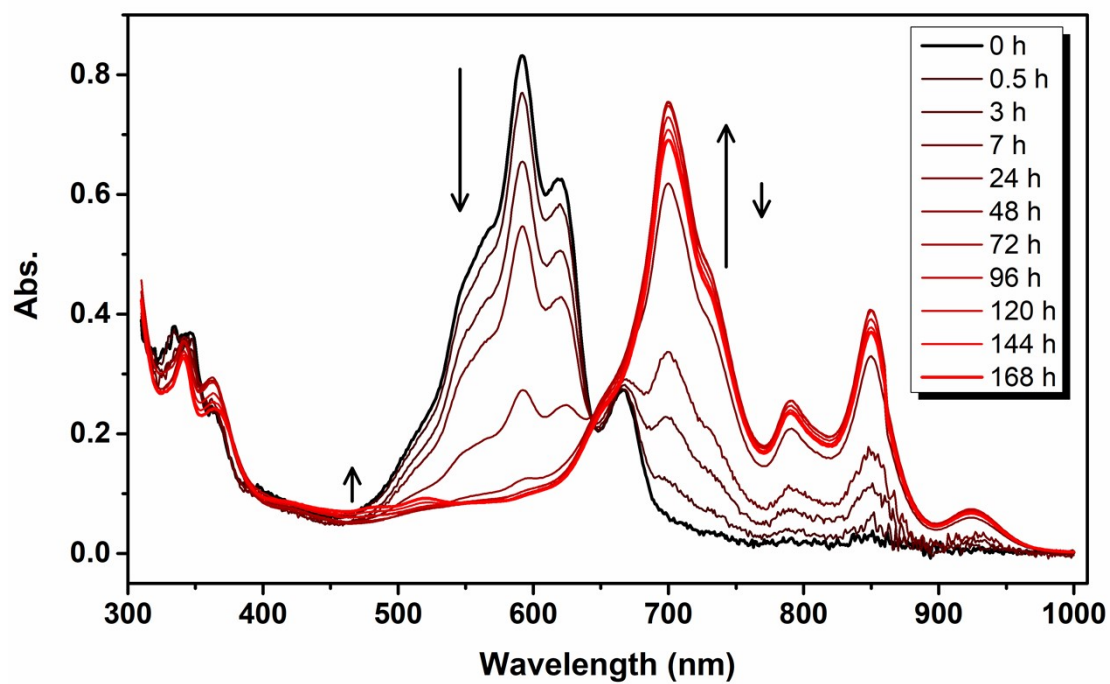

**Figure S11.** Time-dependent UV-Vis-NIR spectra of PBI<sup>2-</sup>-4Cz in DMF under ambient air ( $C \sim 1.0 \times 10^{-5}$  mol/L, 298 K).



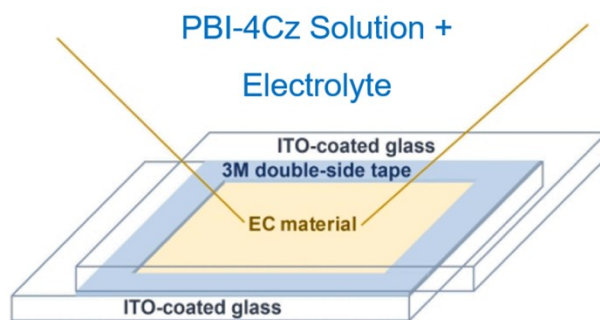

**Figure S12.** Schematic illustration of the PBI-4Cz solution-based electrochromic device.<sup>5</sup>

## References

- [1] Frisch, M. J.; Trucks, G. W.; Schlegel, H. B.; Scuseria, G. E.; Robb, M. A.; Cheeseman, J. R.; Scalmani, G.; Barone, V.; Petersson, G. A.; Nakatsuji, H.; Li, X.; Caricato, M.; Marenich, A.; Bloino, J.; Janesko, B. G.; Gomperts, R.; Mennucci, B.; Hratchian, H. P.; Ortiz, J. V.; Izmaylov, A. F.; Sonnenberg, J. L.; Williams-Young, D.; Ding, F.; Lipparini, F.; Egidi, F.; Goings, J.; Peng, B.; Petrone, A.; Henderson, T.; Ranasinghe, D.; Zakrzewski, V. G.; Gao, J.; Rega, N.; Zheng, G.; Liang, W.; Hada, M.; Ehara, M.; Toyota, K.; Fukuda, R.; Hasegawa, J.; Ishida, M.; Nakajima, T.; Honda, Y.; Kitao, O.; Nakai, H.; Vreven, T.; Throssell, K.; Montgomery, J. A.; Jr.; Peralta, J. E.; Ogliaro, F.; Bearpark, M.; Heyd, J. J.; Brothers, E.; Kudin, K. N.; Staroverov, V. N.; Keith, T.; Kobayashi, R.; Normand, J.; Raghavachari, K.; Rendell, A.; Burant, J. C.; Iyengar, S. S.; Tomasi, J.; Cossi, M.; Millam, J. M.; Klene, M.; Adamo, C.; Cammi, R.; Ochterski, J. W.; Martin, R. L.; Morokuma, K.; Farkas, O.; Foresman, J. B.; Fox, D. J. *Gaussian 09, Version 9.0*, Gaussian, Inc., Wallingford, Connecticut, **2016**.
- [2] Dennington, R.; Keith, T.; Millam, J. *GaussView, Version 5*, Semichem Inc., Shawnee Mission, Kansas, **2009**.
- [3] Lu, T.; Chen, F. Multiwfn: A Multifunctional Wavefunction Analyzer. *J. Comput. Chem.* **2012**, *33*, 580-592.
- [4] Wang, Z.; Sun, Y.; Lin, S.; Wang, G.; Chang, X.; Gou, X.; Liu, T.; Jin, S.; He, G.; Wei, Y.-C.; Chou, P.-T.; Fang, Y. Orthogonal Carbazole-Perylene Bisimide Pentad: A Photoconversion-Tunable Photosensitizer with Diversified Excitation and Excited-State Relaxation Pathways. *Sci. China Chem.* **2021**, *64*, 2193-2202.
- [5] Song, R.; Li, G.; Zhang, Y.; Rao, B.; Xiong, S.; He, G. Novel Electrochromic Materials Based on Chalcogenoviologens for Smart Windows, E-Price Tag and Flexible Display with Improved Reversibility and Stability. *Chem. Eng. J.* **2021**, *422*, 130057.
